# Supplementary material for: The causal role of the somatosensory cortex in prosocial behaviour
Source: eLife. 2018 May 8;7:e32740. doi: 10.7554/eLife.32740 (PMC5973831; doi:10.7554/eLife.32740)
Supplement: Figure 1—figure supplement 1—source data 1. [file elife-32740-fig1-figsupp1-data1.xlsx]

## Sheet: Sheet1
	all sbj		believers					TMS STUDY		all sbj		believers					all sbj					all sbj
Participant #	Setup_realistic	Same_Movie	Setup_realistic	Same_Movie				VP_Code	Inclusion	Setup_realistic	Same_Movie	Setup_realistic	Same_Movie				Setup_realistic	Same_Movie		Setup_realistic	Same_Movie	Setup_realistic	Same_Movie		Setup_realistic	Same_Movie
1	6	6	6	6				VP01	1	6	2	6	2				1	1	Q1	5.25	2	1	1	Q1	6	2
2	6	2	6	2				VP02	1	7	3	7	3				1	1	Q3	7	5.75	1	1	Q3	7	5.25
3	7	2	7	2				VP03	1	6	1	6	1				3	2	Q3-Q1	1.75	3.75	4	1	Q3-Q1	1	3.25
4	1	5						VP04	0	3	6						5	2	median	6	2.5	4	2	median	6	4
5	6	6	6	6	prob with eeg data			VP05	1	7	6	7	6				5	2				5	2
6	7	2	7	2				VP06	1	6	2	6	2				6	2				5	2
7	4	3	4	3				VP07	1	7	2	7	2				6	2				6	2
8	6	2	6	2				VP08	1	6	2	6	2				6	2				6	2
9	6	3	6	3				VP09	1	6	2	6	2				6	2				6	2
10	6	5	6	5				VP10	0	1	7						6	3				6	2
11	1	7						VP11	1	7	6	7	6				6	3				6	2
12	7	1	7	1				VP12	0	1	4						6	4				6	2
13	6	2	6	2				VP13	1	6	5	6	5				7	5				6	3
14	5	6	5	6				VP14	1	7	1	7	1				7	6				6	3
15	6	5	6	5				VP15	0								7	6				6	3
16	7	1	7	1				VP16	1	7	2	7	2				7	6				6	4
17	5	5	5	5				VP17	1	6	2	6	2				7	6				6	4
18	7	4	7	4				VP18	1	5	6	5	6				7	7				6	4
19	6	4	6	4				VP19	1	5	3	5	3									6	4
20	7	4	7	4				mean		5.5	3.44444	6.26667	3									6	5
21	6	4	6	4				std.		1.91741	2.00653	0.703732	1.81265									6	5
22	6	2	6	2				corr			-0.473972		-0.0559951									6	5
23	4	6																				6	5
24	6	2	6	2																		7	5
25	6	7	6	7					correlation with unbelievers													7	6
26	7	2	7	2				Variable	Correlations (Spreadsheet3) Marked correlations are significant at p < .05000 N=18 (Casewise deletion of missing data)													7	6
27	6	3	6	3					Var6	Var7												7	6
28	7	2	7	2				Var6	1.0000	-.4740												7	6
29	6	6	6	6					p= ---	p=.047												7	6
30	6	1	6	1				Var7	-.4740	1.0000												7	6
31	6	6	6	6					p=.047	p= ---												7	7
32	7	5	7	5																		7	7
mean	5.78125	3.78125	6.17241	3.55172
std.	1.47527	1.89625	0.710582	1.82417
corr		-0.45584		-0.323981
	corr with not believers
	Variable	Correlations (Spreadsheet3) Marked correlations are significant at p < .05000 N=32 (Casewise deletion of missing data)
		Var1	Var2
	Var1	1.0000	-.4558
		p= ---	p=.009
	Var2	-.4558	1.0000
		p=.009	p= ---
	CORR ONLY BELIEV
	Variable	Correlations (Spreadsheet3) Marked correlations are significant at p < .05000 N=29 (Casewise deletion of missing data)
		Var3	Var4
	Var3	1.0000	-.3240
		p= ---	p=.086
	Var4	-.3240	1.0000
		p=.086	p= ---

## Sheet: Excluding Unbelievers EEG
	believers
Participant #	Setup_realistic	Same_Movie			Setup_realistic	Same_Movie
1	6	6			4	1		Setup_realistic	Same_Movie
2	6	2			5	1	median	6	3.5
3	7	2			5	1
6	7	2			6	2
7	4	3			6	2			Setup_realistic		Same_Movie
8	6	2			6	2		Q1	6	6	2	2
9	6	3			6	2		Q3	7	7	5	5
10	6	5			6	2		Q3-Q1	1		3
12	7	1			6	2		median	6		3
13	6	2			6	2
14	5	6			6	2
15	6	5			6	3
16	7	1			6	3
17	5	5			6	3
18	7	4			6	4
19	6	4			6	4
20	7	4			6	4
21	6	4			6	4
22	6	2			6	5
24	6	2			7	5
25	6	7			7	5
26	7	2			7	5
27	6	3			7	6
28	7	2			7	6
29	6	6			7	6
30	6	1			7	6
31	6	6			7	6
32	7	5			7	7
mean	6.17857	3.46429
std.	0.722832	1.79469
s.e.m.	0.136602	0.339164
corr		-0.32323

## Sheet: Excluding Unbelievers TMS
	TMS STUDY		believers
	VP_Code	Inclusion	Setup_realistic	Same_Movie
	VP01	1	6	2		Setup_realistic	Same_Movie
	VP02	1	7	3	Q1	6	2
	VP03	1	6	1	Q3	7	4.5
	VP05	1	7	6	Q3-Q1	1	2.5
	VP06	1	6	2	median	6	2
	VP07	1	7	2
	VP08	1	6	2
	VP09	1	6	2
	VP11	1	7	6
	VP13	1	6	5
	VP14	1	7	1
	VP16	1	7	2
	VP17	1	6	2
	VP18	1	5	6
	VP19	1	5	3
	mean		6.26667	3
	std.		0.703732	1.81265
	corr			-0.0559951
